# Supplementary material for: Synthesis, functionalization, and isolation of planar-chiral pillar[5]arenes with bulky substituents using a chiral derivatization agent
Source: Royal Society of Chemistry journal article supplement (doi:10.1039/c9ra03135a), 2019-01-01
Supplement: c9ra03135a1.pdf [file c9ra03135a1.pdf]

## Supplementary Information

### Synthesis, Functionalization, and Isolation of Planar-Chiral Pillar[5]arenes with Bulky Substituents Using a Chiral Derivatization Agent

Talal F. Al-Azemi, \*,<sup>a</sup> Mickey Vinodh,<sup>a</sup> Fatemeh H. Alipour<sup>a</sup> and Abdirahman A. Mohamod<sup>a</sup>  
*Chemistry Department, Kuwait University, P.O. Box 5969, Safat 13060, Kuwait*

#### Table of contents

|                                                                                                      |       |
|------------------------------------------------------------------------------------------------------|-------|
| Single crystal X-ray diffraction data                                                                | S2    |
| Thermal Ellipsoid representation of <b>Pillar-1</b>                                                  | S3    |
| Presentation of the stacking patterns of <b>Pillar-1</b>                                             | S3    |
| <sup>1</sup> H NMR titration curves of complexation between <b>Pillar-1</b> and <b>OMA</b>           | S4    |
| <sup>1</sup> H- <sup>1</sup> H COSY spectrum of complexation between <b>Pillar-1</b> and <b>OMA</b>  | S5    |
| <sup>1</sup> H- <sup>1</sup> H ROSEY spectrum of complexation between <b>Pillar-1</b> and <b>OMA</b> | S5    |
| NMR spectra                                                                                          | S6-12 |
| 2D NMR spectra                                                                                       | S13   |
| CD spectra                                                                                           | S14   |

**Single crystal X-ray diffraction data:****Table 1S.** Summary on the nature of the crystals and various crystallographic parameters of **Pilla-1**.

| <b>Crystal Name</b>                                  | <b>Pillar-1</b>                                                  |
|------------------------------------------------------|------------------------------------------------------------------|
| Crystal Dimension/mm                                 | 0.20 X 0.16 X 0.11                                               |
| Crystal Color, Habit                                 | Colorless, Block                                                 |
| Formula                                              | C <sub>93</sub> H <sub>144</sub> Cl <sub>8</sub> O <sub>10</sub> |
| Crystal system                                       | Orthorhombic                                                     |
| Space group(no.)                                     | P b c n (60)                                                     |
| T/K                                                  | 150                                                              |
| a/Å                                                  | 21.8547(8)                                                       |
| b//Å                                                 | 22.2502(9)                                                       |
| c/Å                                                  | 20.4982(14)                                                      |
| $\alpha$                                             | 90                                                               |
| $\beta$                                              | 90                                                               |
| $\gamma$                                             | 90                                                               |
| V/ Å <sup>3</sup>                                    | 9967.7(9)                                                        |
| Z                                                    | 4                                                                |
| $\mu(\text{CuK}\alpha) / \text{mm}^{-1}$             | 0.277                                                            |
| $\rho_{\text{calcd}}/\text{g cm}^{-3}$               | 1.137                                                            |
| $\theta_{\text{max}}/\text{deg}$                     | 25.030                                                           |
| Reflections collected                                | 54825                                                            |
| Unique reflections                                   | 8766                                                             |
| R <sub>int</sub>                                     | 0.0720                                                           |
| R (I > 2 $\sigma$ )                                  | 0.0767                                                           |
| R (all data)                                         | 0.1201                                                           |
| R <sub>w</sub> (all data)                            | 0.2499                                                           |
| $\Delta \rho  _{\text{max}} \text{e } \text{Å}^{-3}$ | 0.627                                                            |

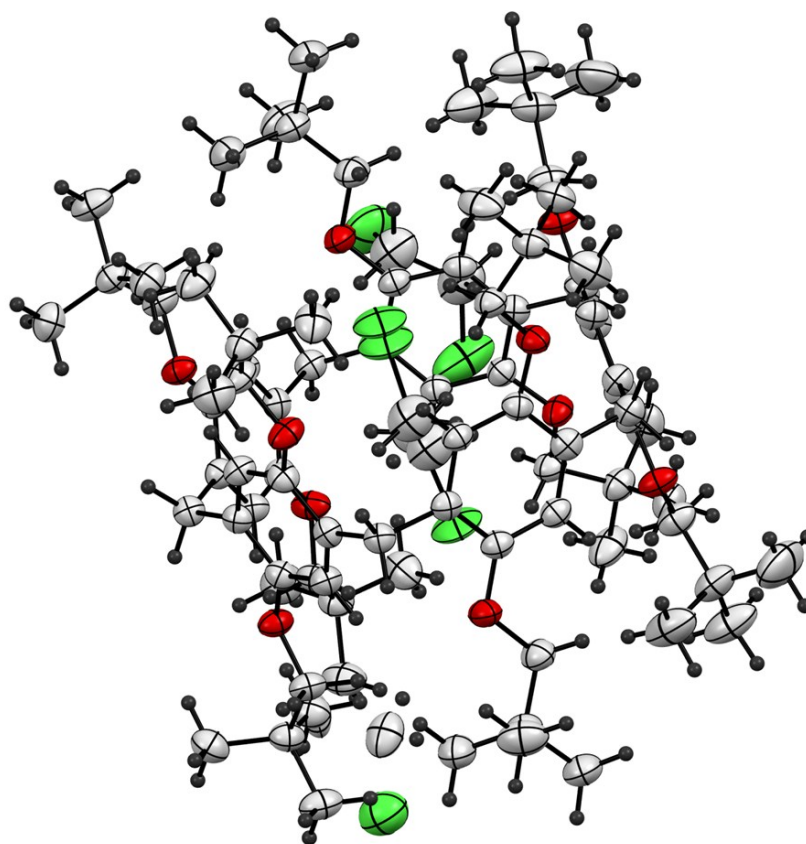

**Figure S1.** Thermal Ellipsoid representation of the crystal structure **Pillar-1**. Color code Gray-carbon; red-oxygen; green –chlorine and black-hydrogen.

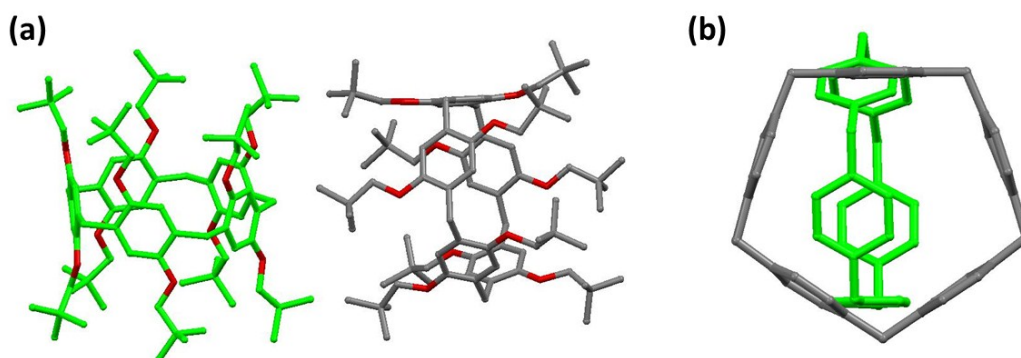

**Figure S2.** Presentation of the stacking patterns of **Pillar-1** (a) side view and (b) top view (only the rigid equilateral pillar parts are shown for clarity).

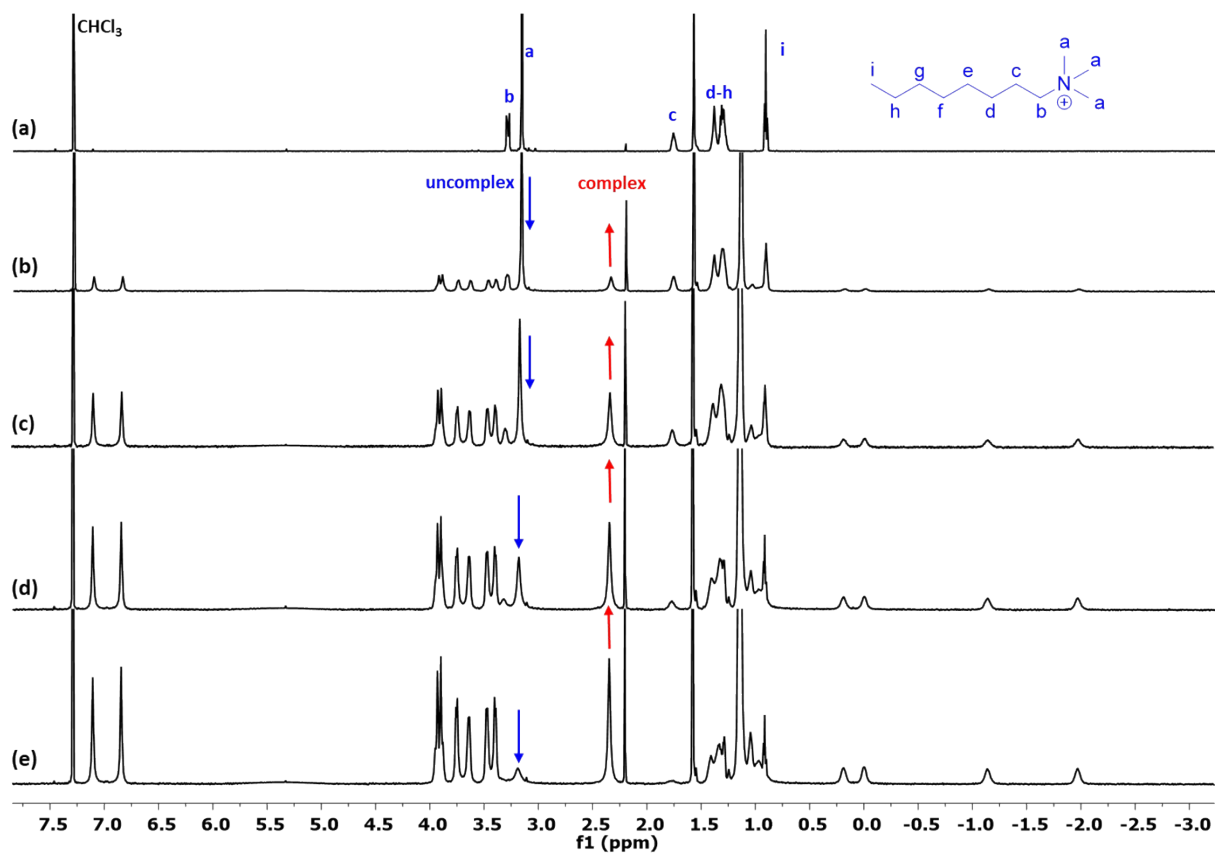

**Figure S3.**  $^1\text{H}$  NMR spectra (600 MHz, chloroform-*d*, 25  $^\circ\text{C}$ ) of **Pilar-1** and **OMA** (a); 6.3 mM **OMA** (b); 1.25 mM **Pilar-1** and 6.3 mM **OMA** (c); 2.52 mM **Pilar-1** and 6.3 mM **OMA** (d); 3.78 mM **Pilar-1** and 6.3 mM **OMA** (e); 5.04 mM **Pilar-1** and 6.3 mM **OMA**.

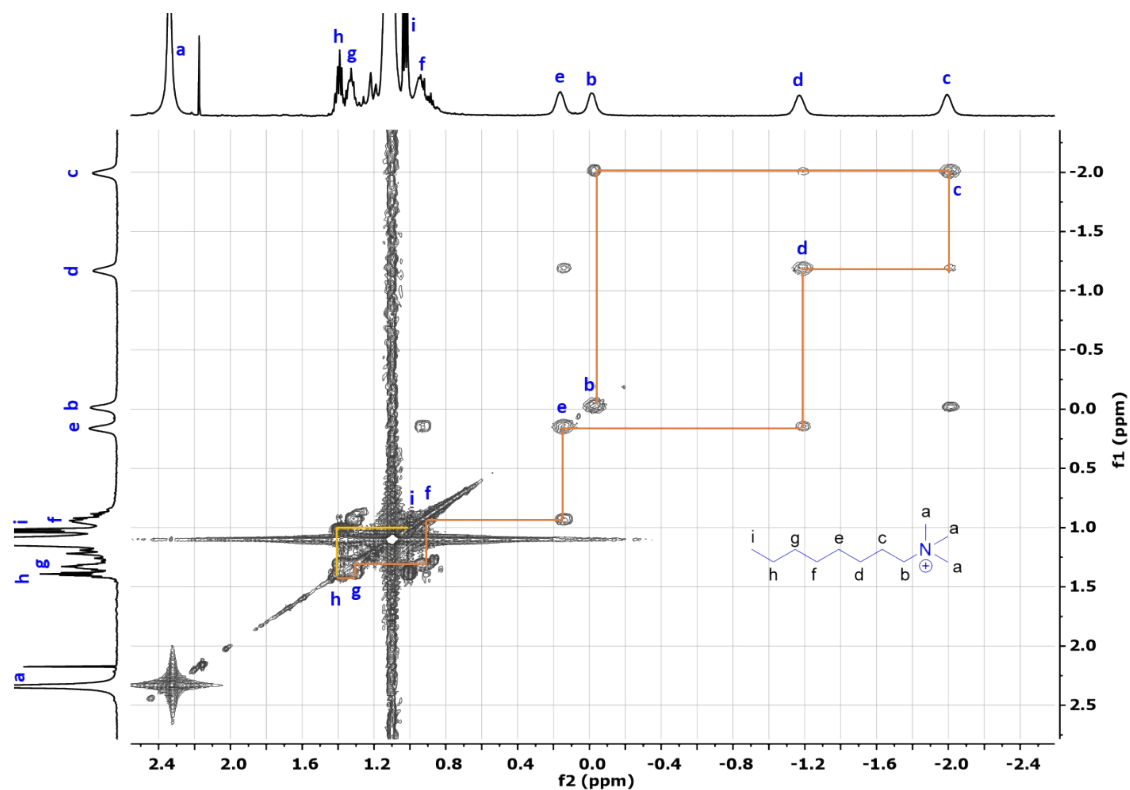

**Figure S4.** Partial  $^1\text{H}$ - $^1\text{H}$  COSY spectrum (600 MHz, chloroform-*d*, 25 °C) of **Pilar-1** (6.3 mM) and **OMA** (6.3 mM).

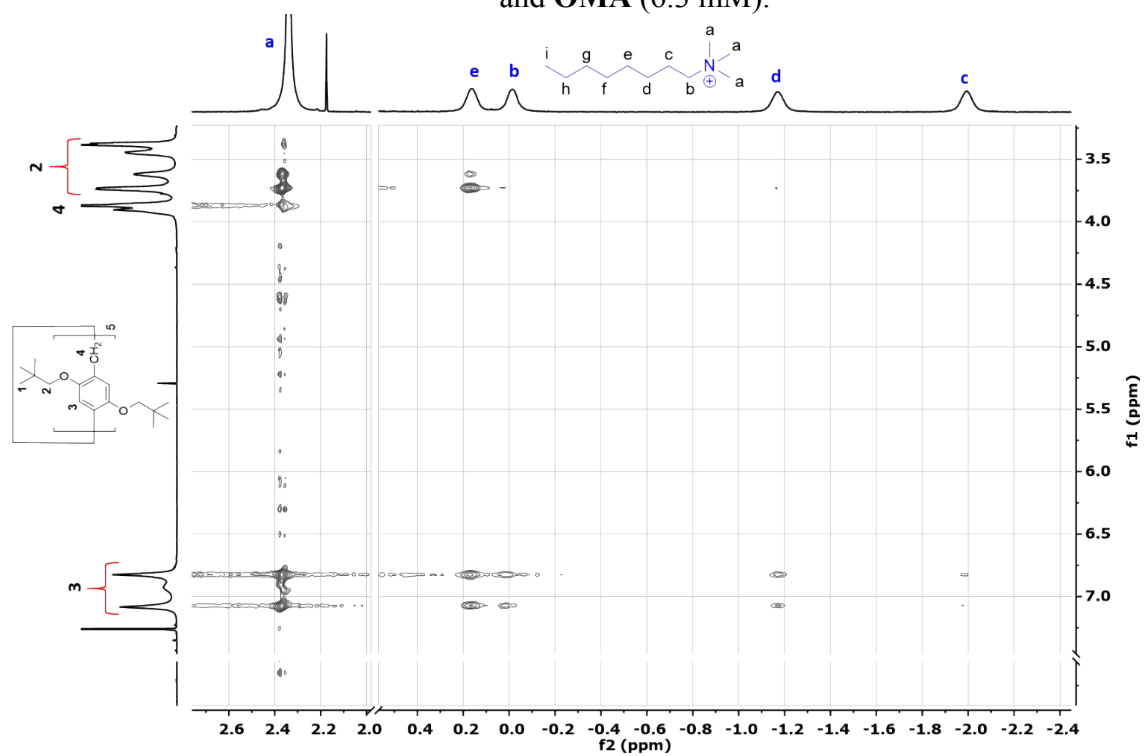

**Figure S5.** Partial ROSEY spectrum (600 MHz, chloroform-*d*, 25 °C) of **Pilar-1** (6.3 mM) and **OMA** (6.3 mM).

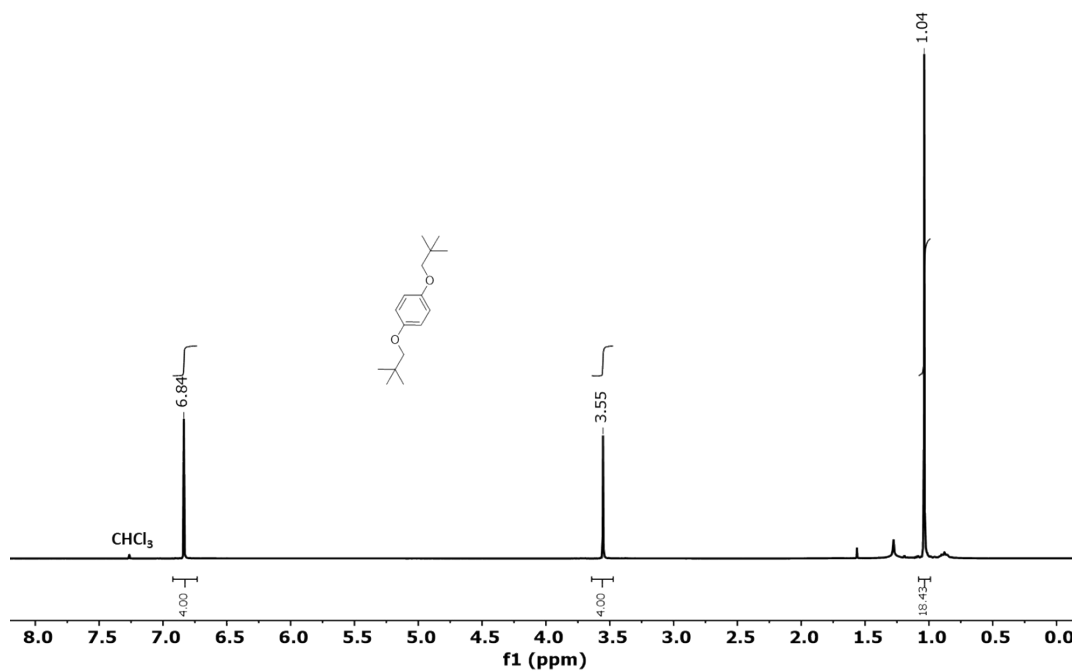

Figure S6. <sup>1</sup>H NMR (600 MHz, CDCl<sub>3</sub>) spectrum of 1,4-bis(neopentyloxy)benzene.

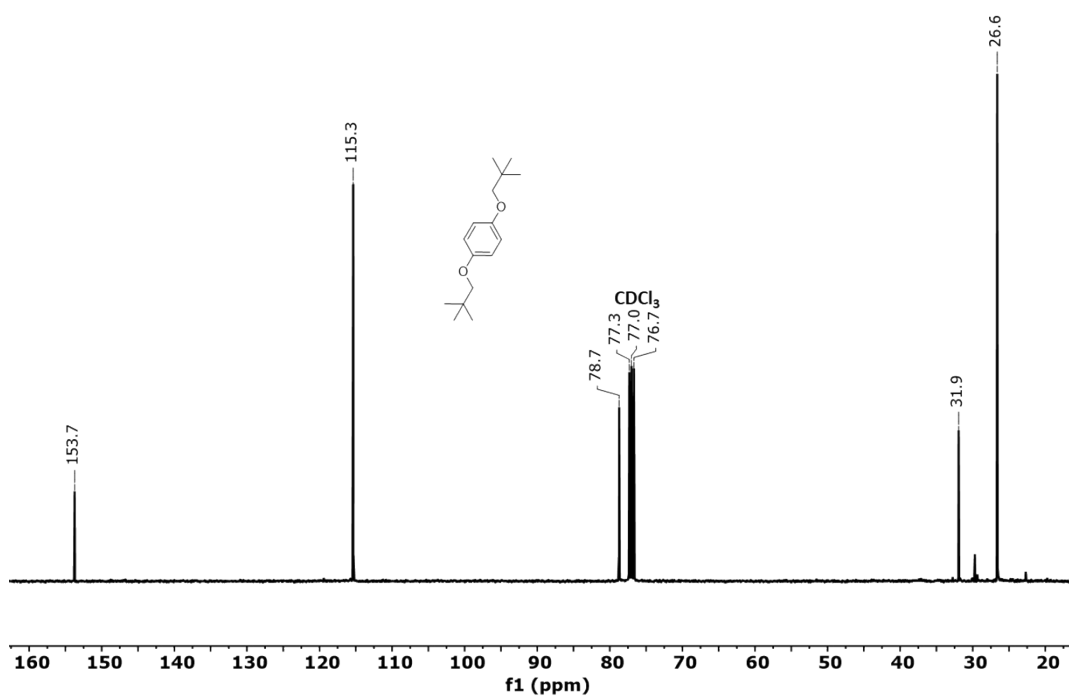

Figure S7. <sup>13</sup>C NMR (150 MHz, CDCl<sub>3</sub>) spectrum of 1,4-bis(neopentyloxy)benzene.

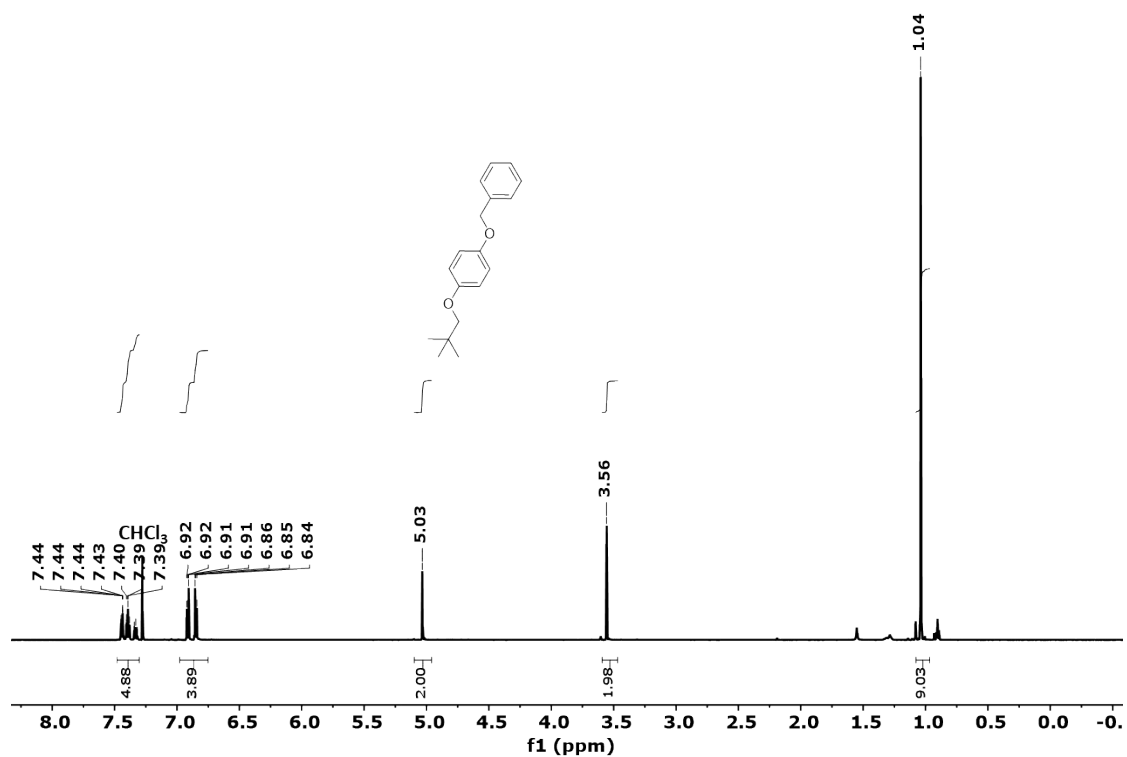

Figure S8.  $^1\text{H}$ NMR (600 MHz,  $\text{CDCl}_3$ ) spectrum of 1-(benzyloxy)-4-(neopentyloxy)benzene.

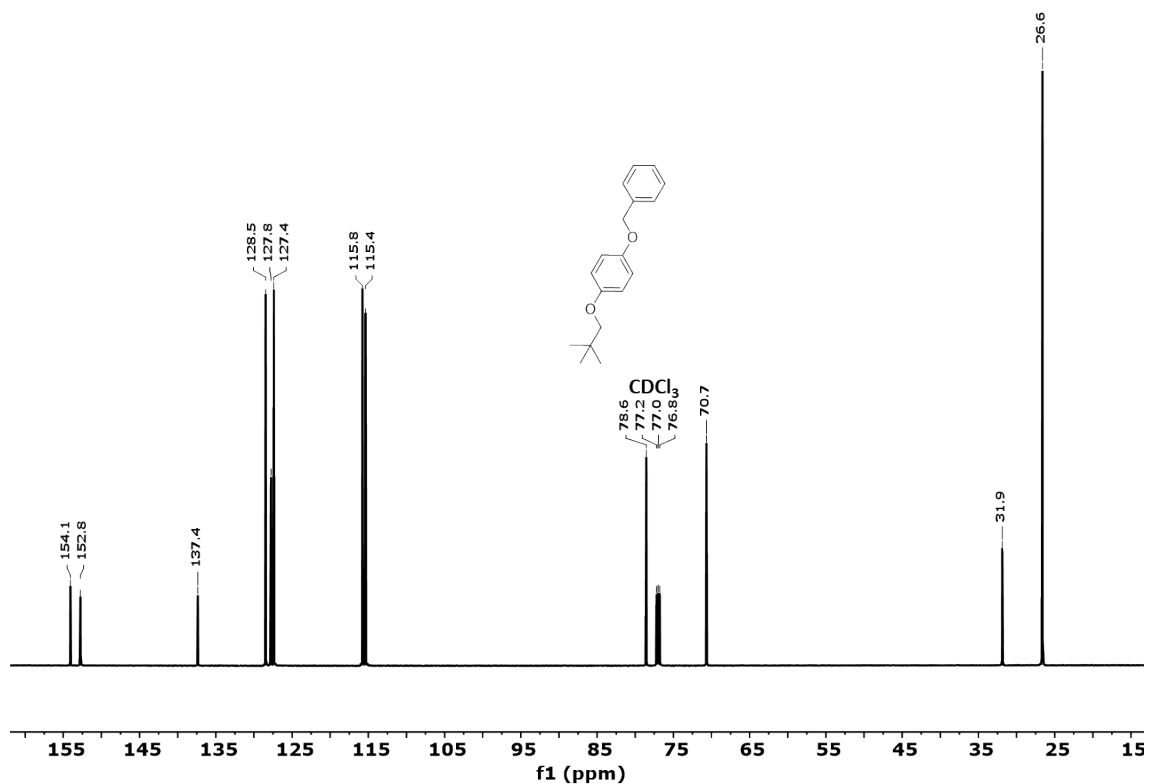

Figure S9.  $^{13}\text{C}$ NMR (100 MHz,  $\text{CDCl}_3$ ) spectrum of 1-(benzyloxy)-4-(neopentyloxy)benzene.

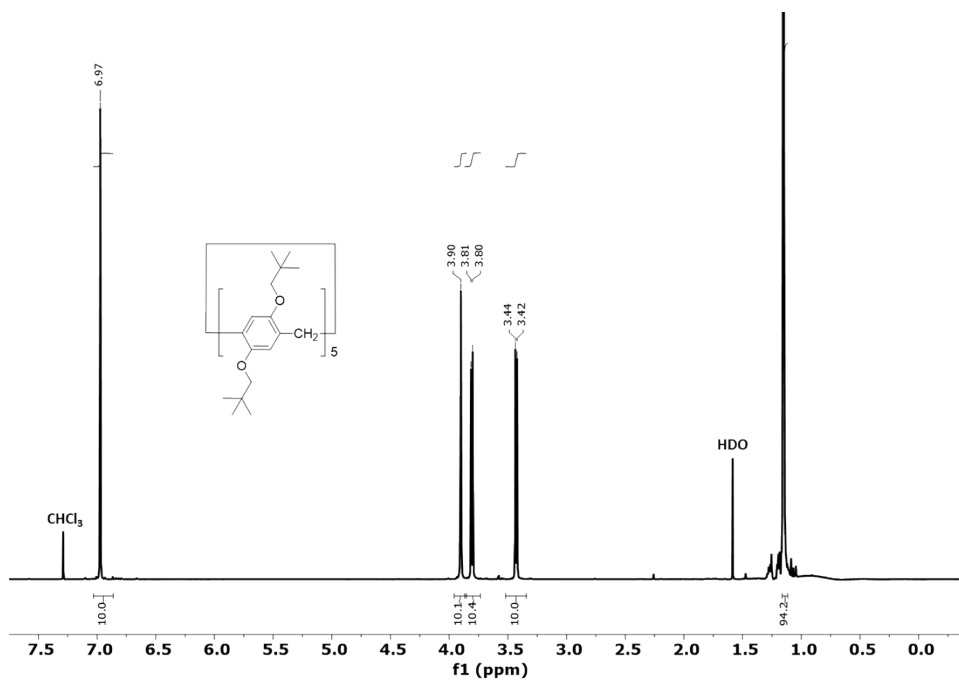

Figure S10.  $^1\text{H NMR}$  (600 MHz,  $\text{CDCl}_3$ ) spectrum of Pillar-1.

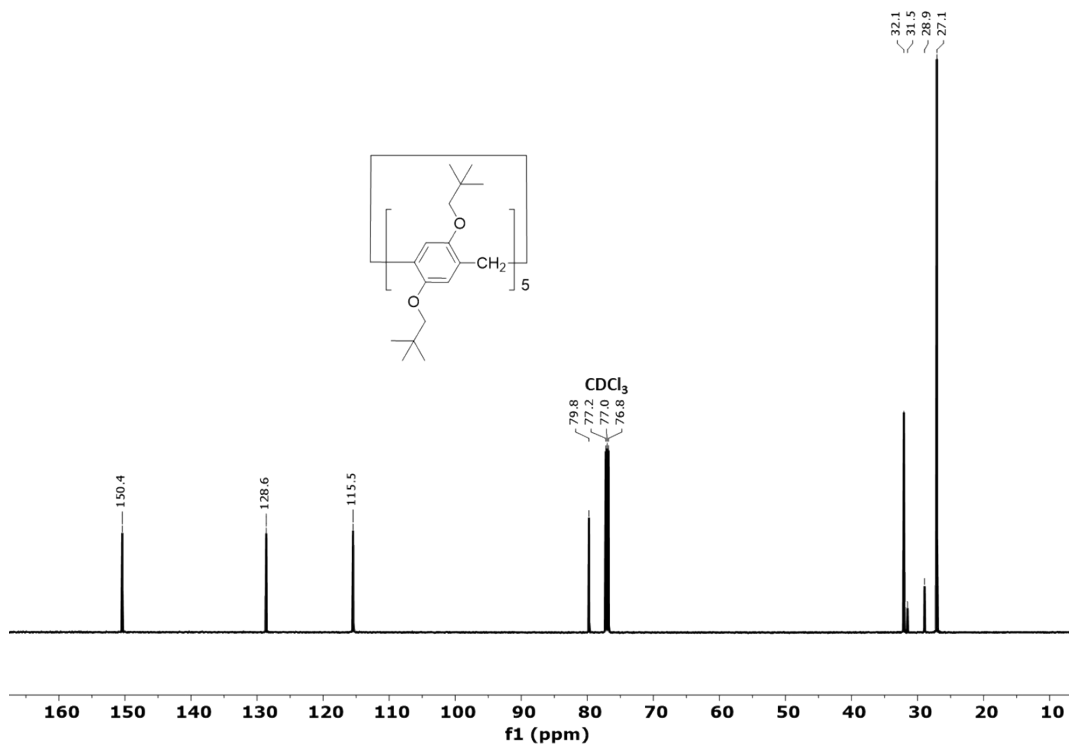

Figure S11.  $^{13}\text{C NMR}$  (150 MHz,  $\text{CDCl}_3$ ) spectrum of Pillar-1.



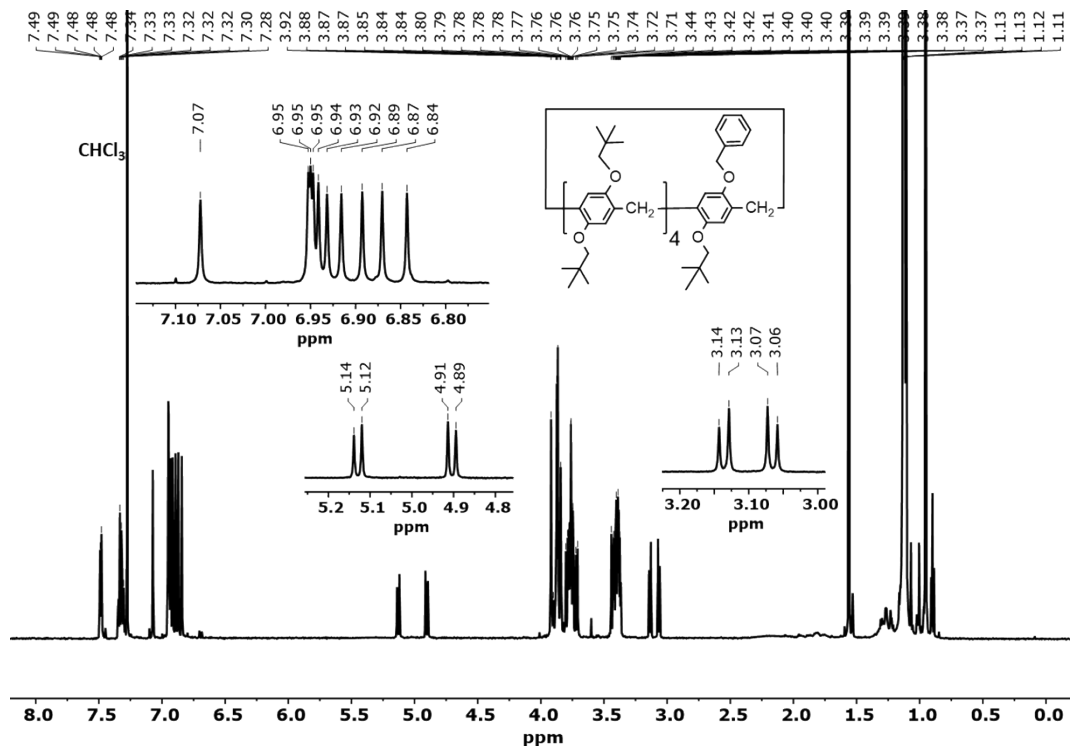

**Figure S12.**  $^1\text{H}$ NMR (600 MHz,  $\text{CDCl}_3$ ) spectrum of Pillar-2.

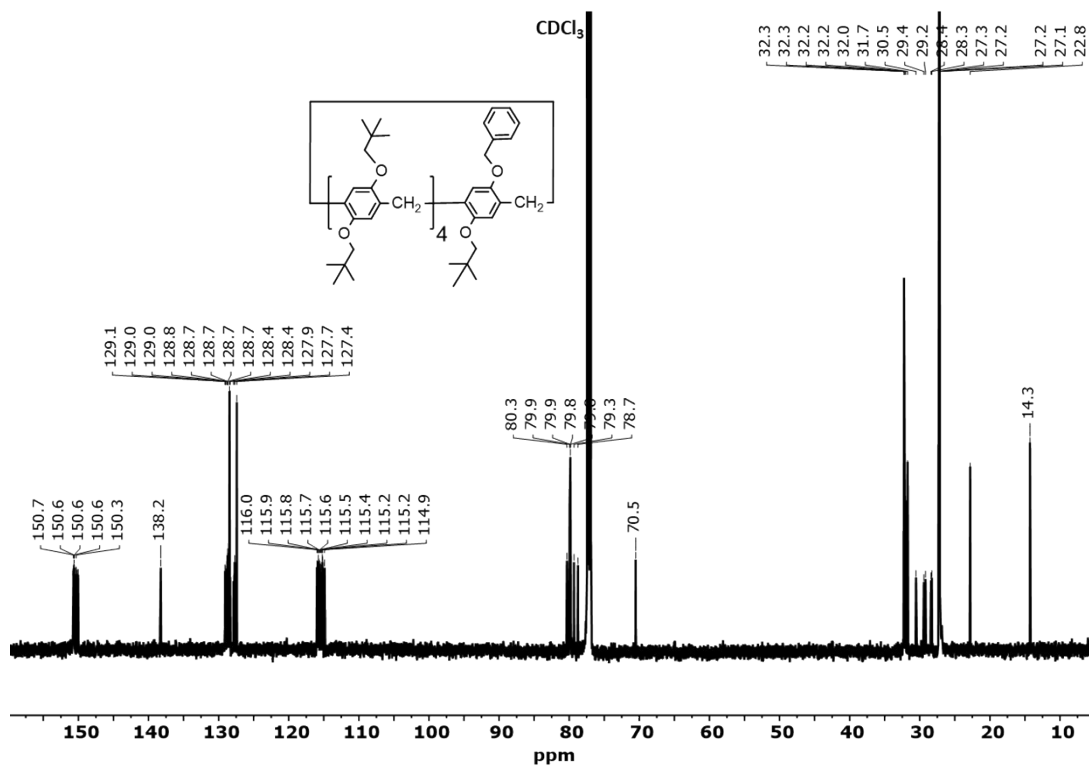

**Figure S13.**  $^{13}\text{C}$ NMR (150 MHz,  $\text{CDCl}_3$ ) spectrum of Pillar-2.

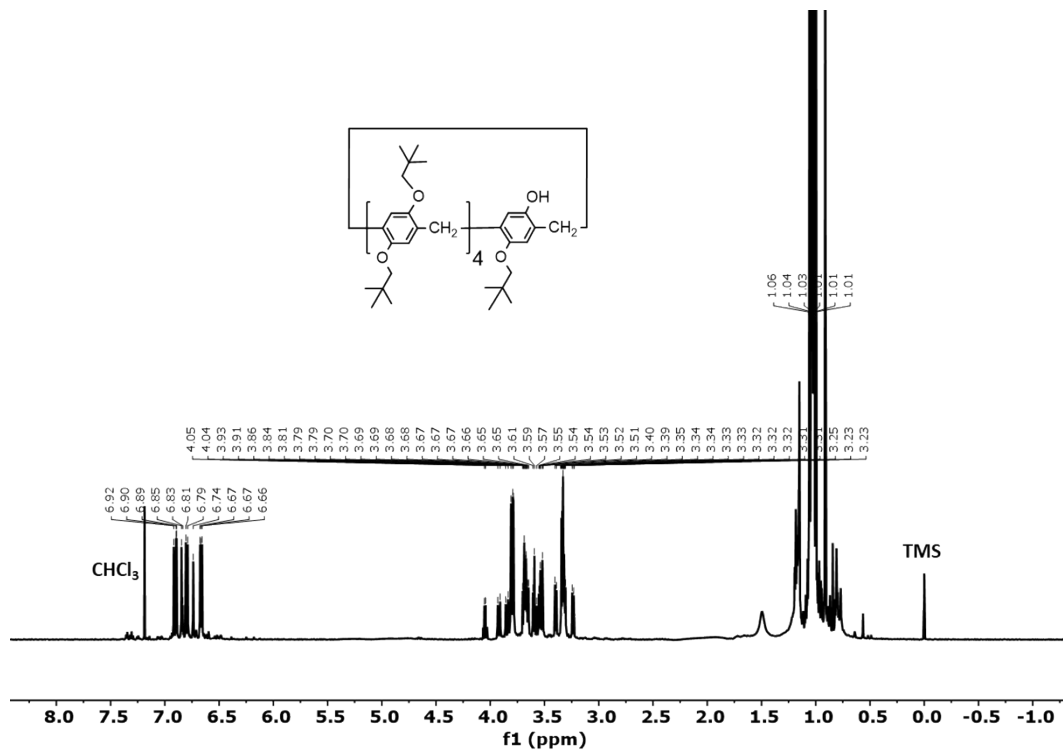

Figure S14. <sup>1</sup>H NMR (600 MHz, CDCl<sub>3</sub>) spectrum of Pillar-3.

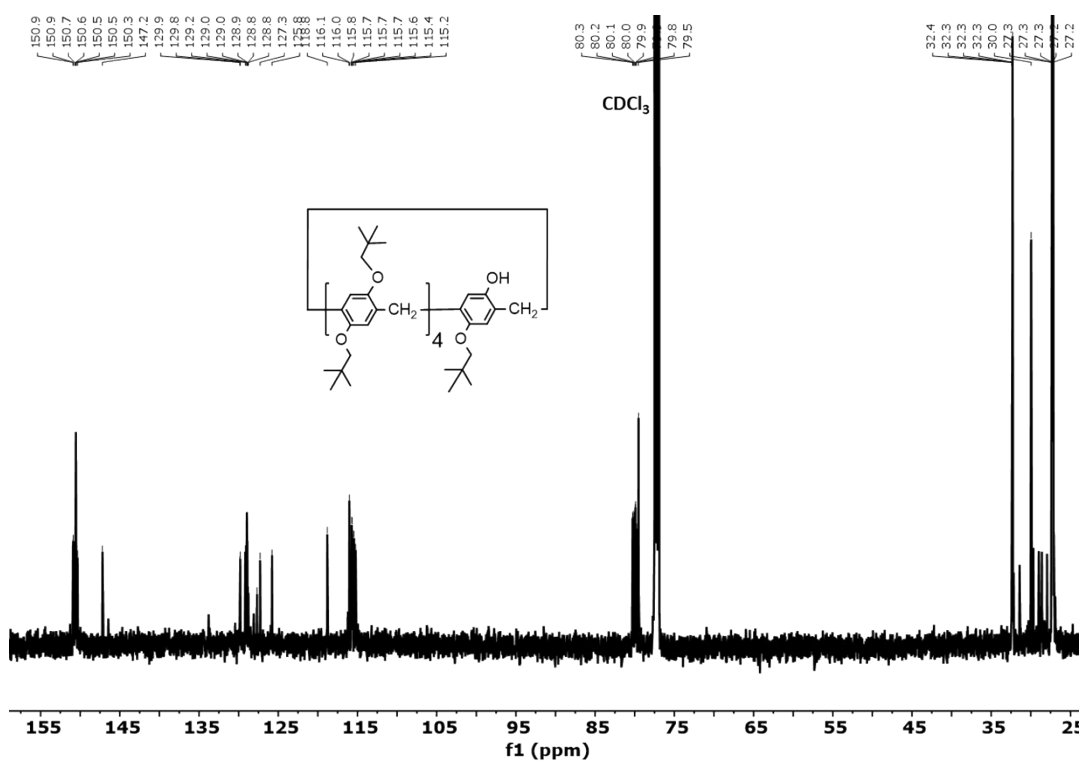

Figure S15. <sup>13</sup>C NMR (150 MHz, CDCl<sub>3</sub>) spectrum of Pillar-3.

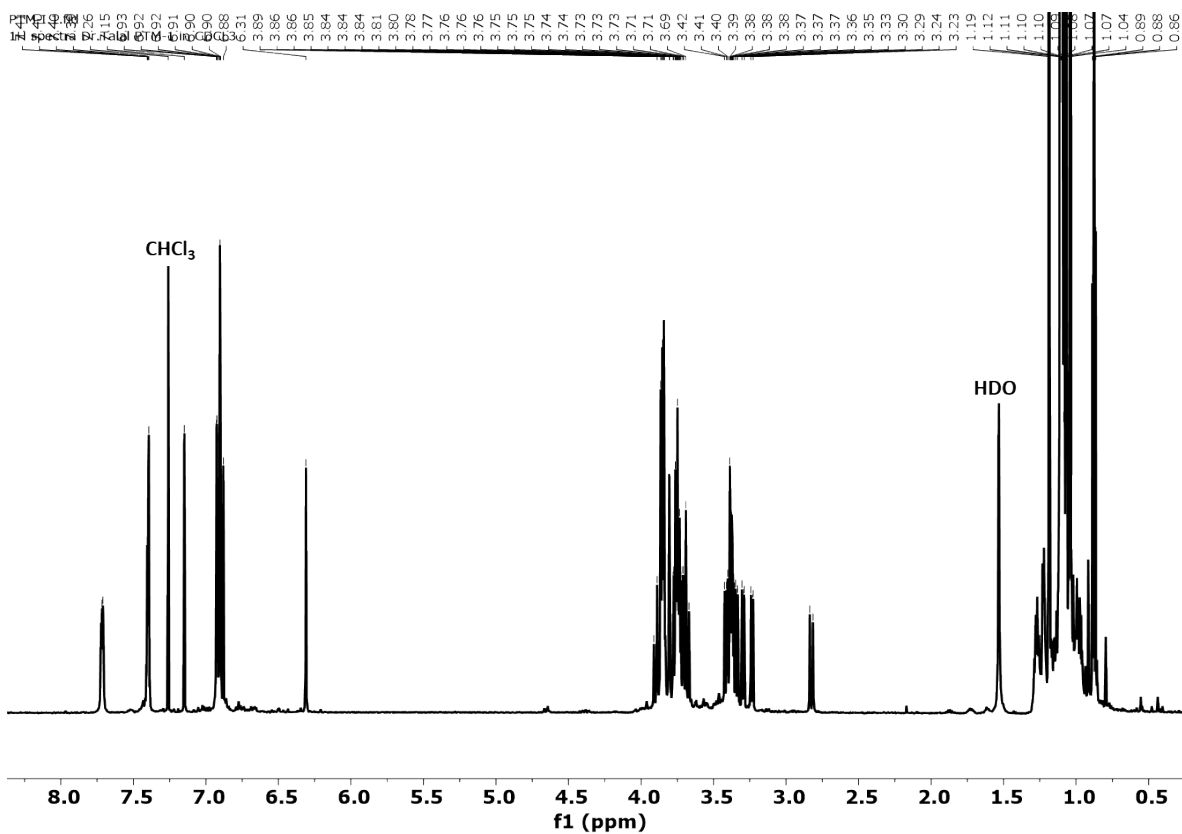Figure S16. <sup>1</sup>HNMR (600 MHz, CDCl<sub>3</sub>) spectrum of Pillar-4a.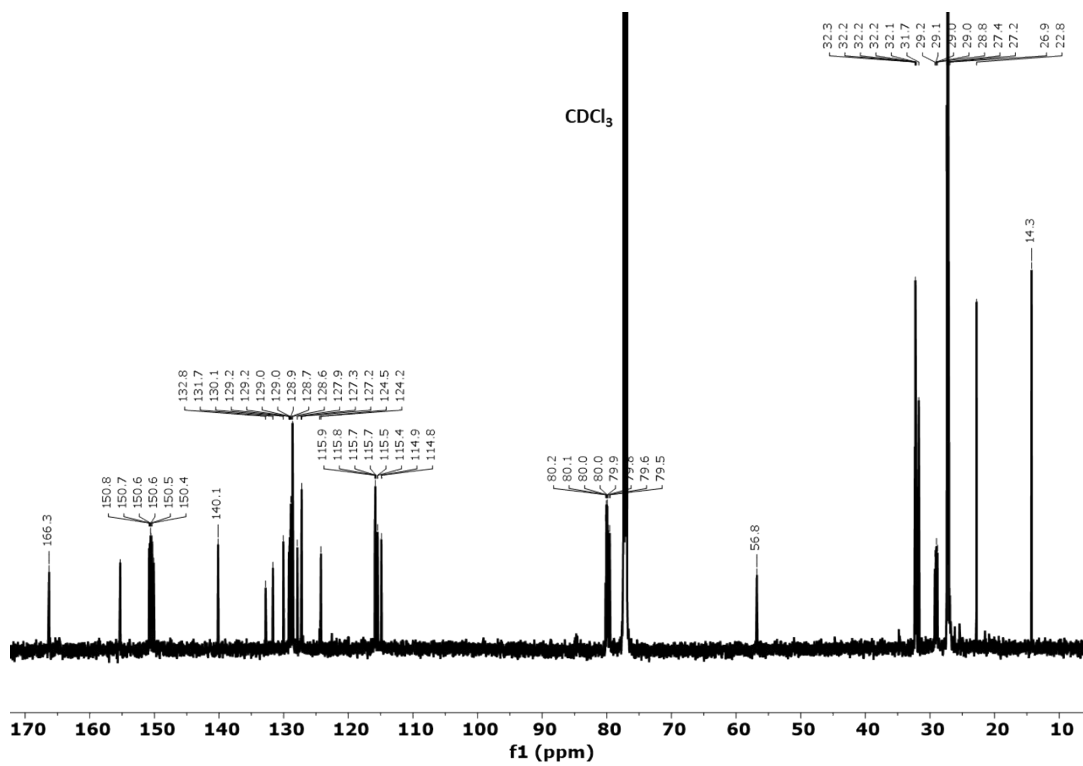Figure S17. <sup>13</sup>CNMR (150 MHz, CDCl<sub>3</sub>) spectrum of Pillar-4a.

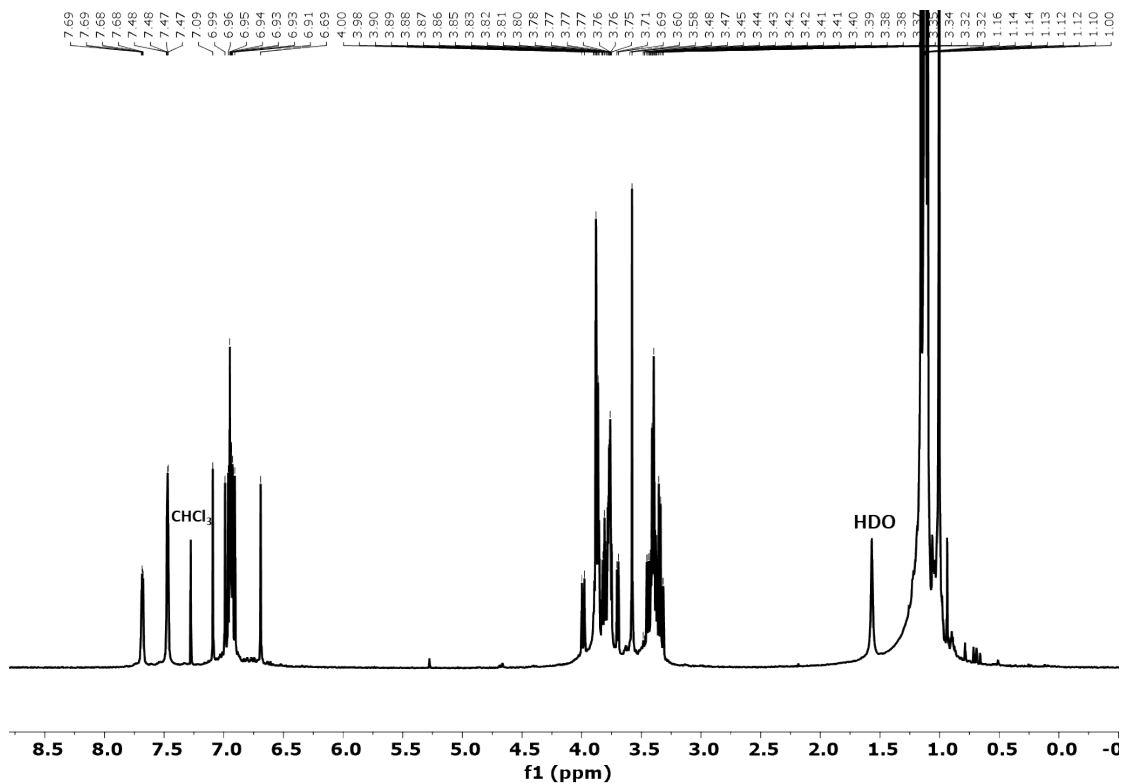

Figure S18. <sup>1</sup>H NMR (600 MHz, CDCl<sub>3</sub>) spectrum of Pillar-4b.

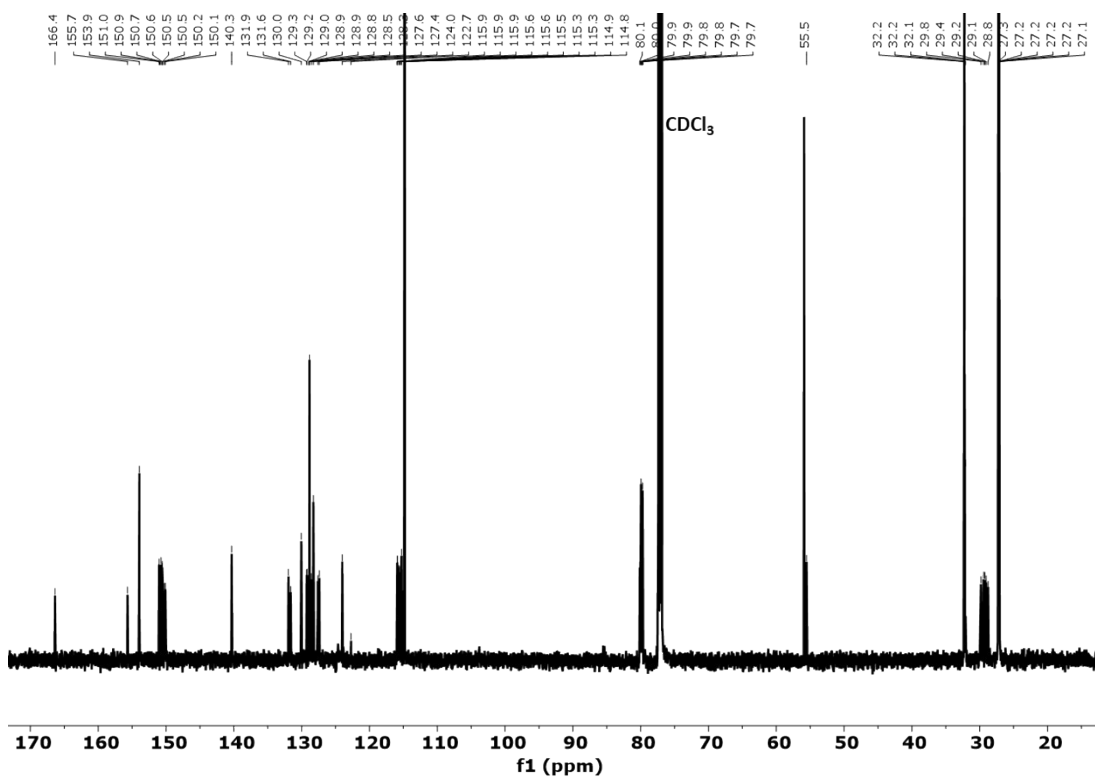

Figure S19. <sup>13</sup>C NMR (150 MHz, CDCl<sub>3</sub>) spectrum of Pillar-4b.

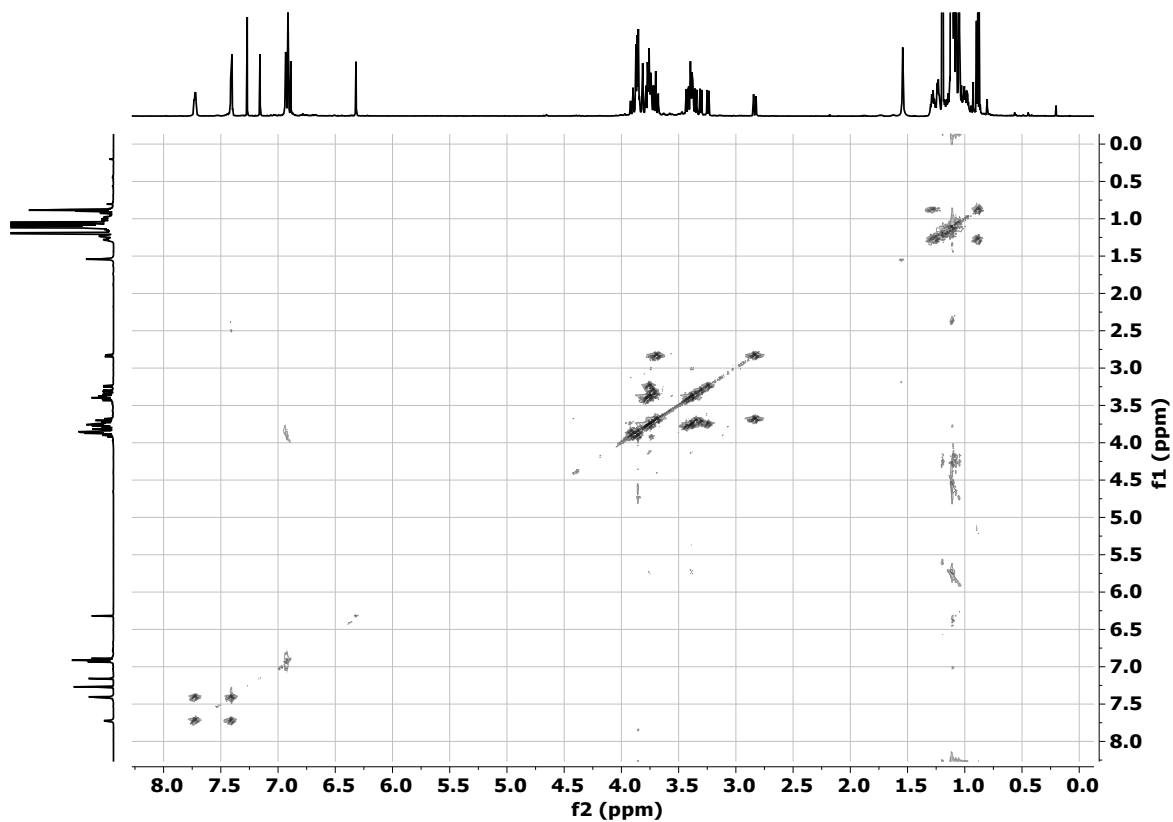

Figure S20.  $^1\text{H}$ - $^1\text{H}$  COSY NMR (600 MHz,  $\text{CDCl}_3$ ) spectrum of first fraction (**Pillar-4a**).

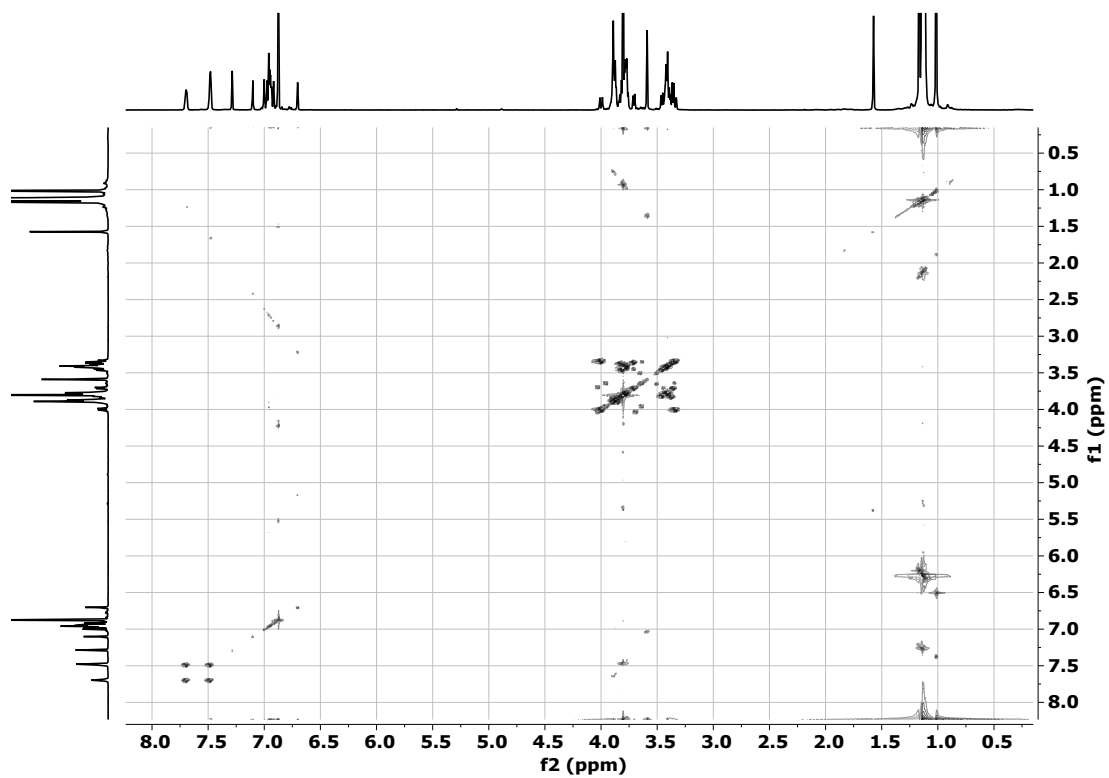

Figure S21.  $^1\text{H}$ - $^1\text{H}$  COSY NMR (600 MHz,  $\text{CDCl}_3$ ) spectrum of second fraction (**Pillar-4b**).

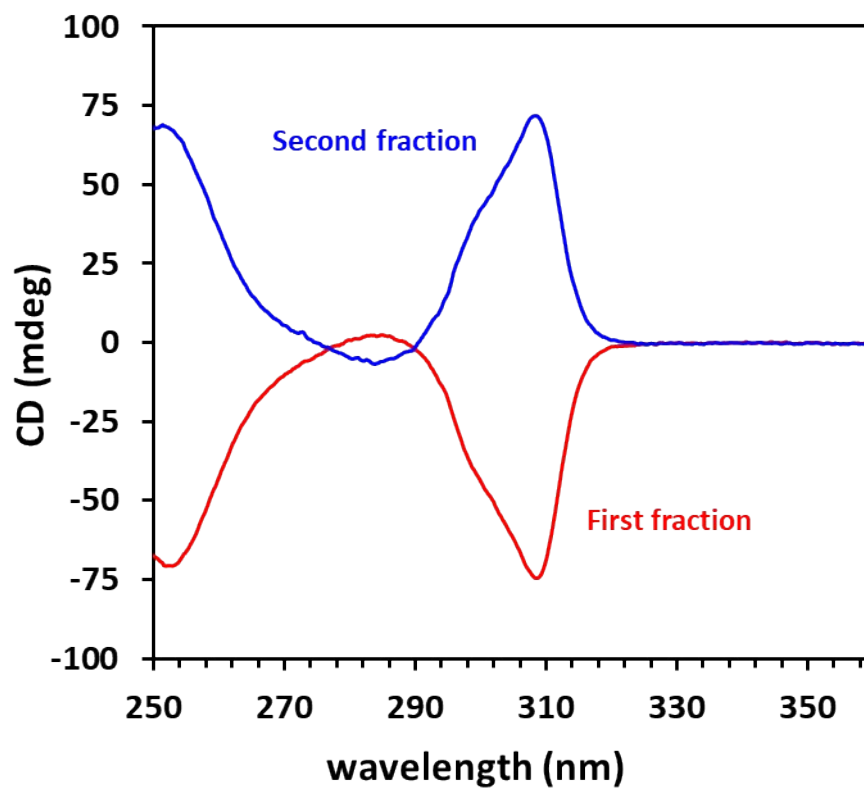

**Figure S22.** CD spectra of the first and second fractions ( $12 \mu\text{Lmol}^{-1}\text{cm}^{-1}$ ) in hexane at 25 °C.
